# Supplementary material
Source: Springer Nature journal article supplement (https://www.springermedizin.de/resource/supplementary/12961_2009_146_MOESM1_ESM.pdf/9571538)
Supplement: MOESM1 [file 9571538]

- Definition of purpose of the tool
- Selection and modification of a framework to guide the evaluation
- Identification of the components of the existing TB and HIV programmes that correspond with the WHO suggested key HIV/TB package for middle-income countries
- Development of a full list of possible indicators of programme effectiveness
- Development of criteria to select tracer indicators to use in evaluation
- Review of existing data sources to ascertain what information is already available to use in the evaluation
- Development of facility audit tools to collect data not routinely available
